# Supplementary material
Source: JCI journal article supplement (doi:10.1172/jci192376)
Supplement: sd1 [file 1]

**A**

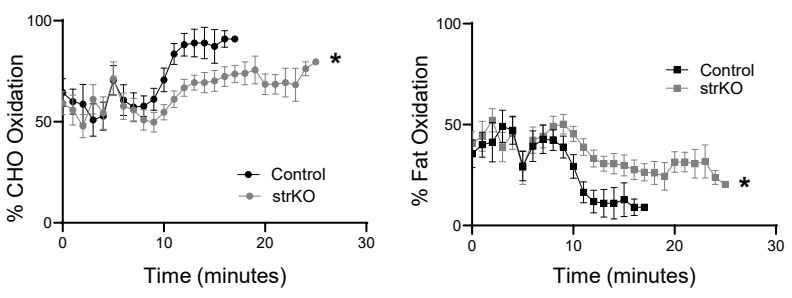

**B**

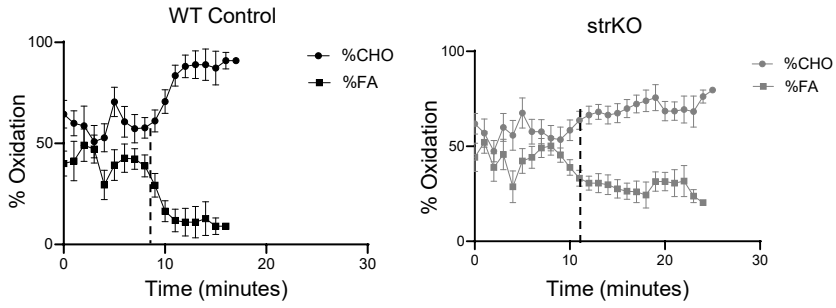

**Supplemental Figure 1. *strNrip1*<sup>-/-</sup> (strKO) mice display a greater utilization of fatty acids during exercise. (A)** Percent carbohydrate (CHO) and fat oxidation calculated from RER measurements derived from the  $VO_{2max}$  testing protocol comparing 8-week-old control and strKO mice (n=9 mice per group). **(B)** Crossover oxidation and aerobic threshold (displayed by the dotted line) represented in WT control and strKO mice derived from %CHO and %FA oxidation measurements (n=9 mice per group). Values are the mean  $\pm$  SEM. \*P < 0.05 versus control, by 2-tailed, unpaired Student's t test.

# Supplemental Figure 2

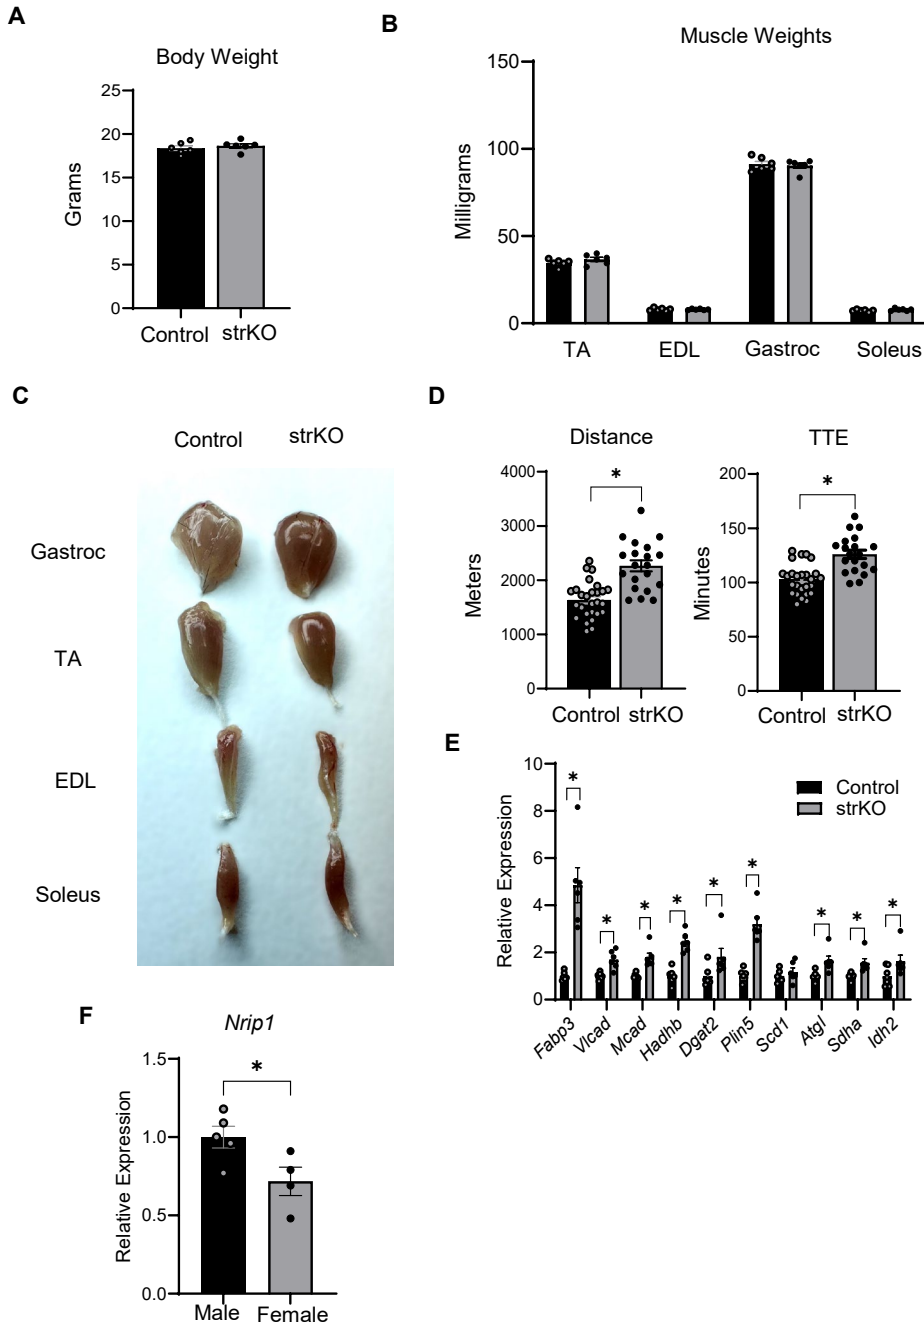

**Supplemental Figure 2. Female (*strNrip1*<sup>-/-</sup>) *strKO* mice display a similar phenotype to male *strKO* mice. (A)** Body weights of 8-week-old WT control and *strNrip1*<sup>-/-</sup> (*strKO*) female mice (n=6 mice per group). **(B)** Muscle weights (tibialis anterior (TA), extensor digialis longus (EDL), gastrocnemius (gastroc) and soleus) of 8-week-old WT control and *strKO* female mice (n=6 mice per group). **(C)** Individual muscle photos as denoted of 8-week-old WT control and *strKO* female mice. **(D)** Endurance performance results showing distance and time to exhaustion comparing 8-week-old female WT control and *strKO* mice (n=20-25 per group). **(E)** Gene expression of fatty acid oxidation and lipid droplet remodeling genes measured by qPCR comparing 8-week-old control and *strKO* female mice (n=5-6 mice per group). **(F)** *Nrip1* gene expression measured by qPCR comparing control male and female 8-week-old mice (n=4-5 mice per group). Values are the mean ± SEM. \*P < 0.05 by 2-tailed, unpaired Student's t-test.

# Supplemental Figure 3

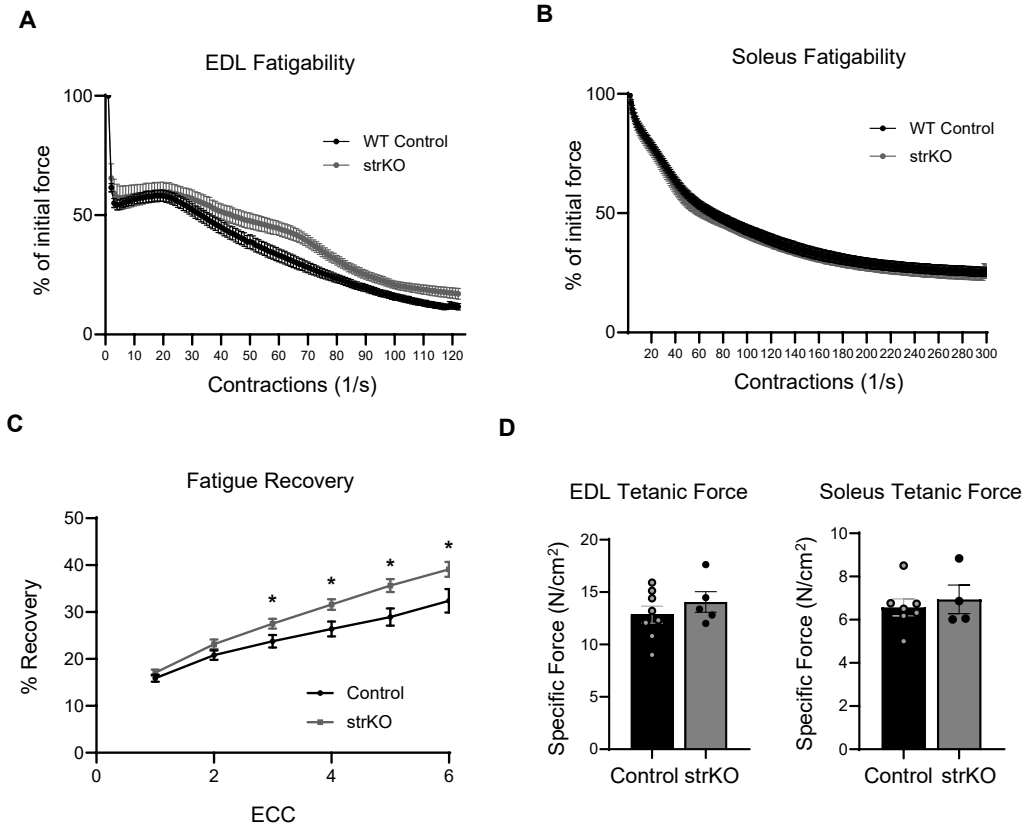

**Supplemental Figure 3. Isolated *strNrip1*<sup>-/-</sup> skeletal muscle exhibits decreased fatigability.** (A) *Ex vivo* fatigability curves comparing 16-week-old male WT control and *strNrip1*<sup>-/-</sup> (*strKO*) extensor digitalis longus (EDL) muscle (n=6-8 mice per group). (B) *Ex vivo* fatigability curves comparing 16-week-old male WT control and *strKO* soleus muscle (n=5-6 mice per group). (C) Percent of tetanic force recovery following the *ex vivo* fatigue protocol in male WT control and *strKO* EDL muscle (n=5-7 mice per group). (D) *Ex vivo* tetanic force comparing EDL and soleus from male WT control and *strKO* muscle (n=4-8 per group). Values are the mean ± SEM. \**P* < 0.05 versus control, by 2-tailed, unpaired Student's *t* test.

# Supplemental Figure 4

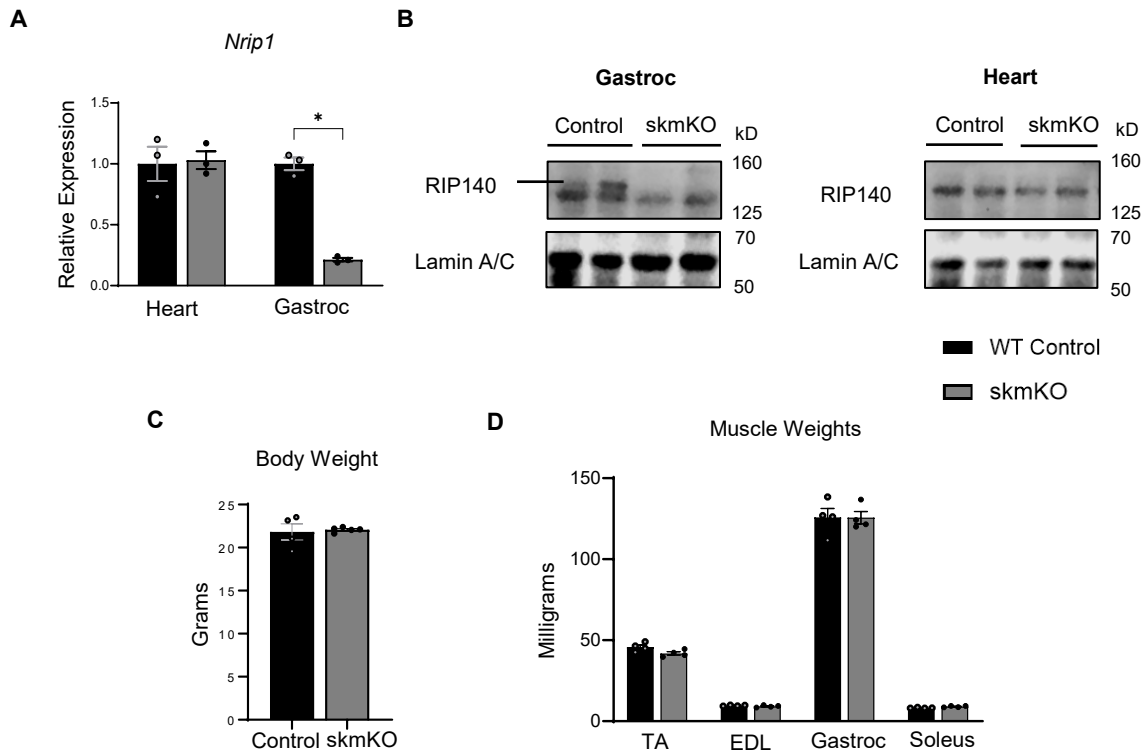

**Supplemental Figure 4. Myogenin-Cre RIP140 KO (*skmNrip1<sup>-/-</sup>*) mouse generation and validation. (A) *Nrip1* expression from heart and gastrocnemius (gastroc) muscle comparing 8-week-old WT control and *skmNrip1<sup>-/-</sup>* (skmKO) male mice (n= 3 per group). (B) RIP140 western blot of gastrocnemius and heart from WT control and skmKO male mice (n= 5 per group). (C) Body weights of 8-week old male control and skmKO mice (n= 4-5 per group). (D) Muscle weights from 8-week old control and skmKO male mice (n= 4-5 per group). Values are the mean  $\pm$  SEM. \* $P < 0.05$  versus control, by 2-tailed, unpaired Student's *t* test.**

# Supplemental Figure 5

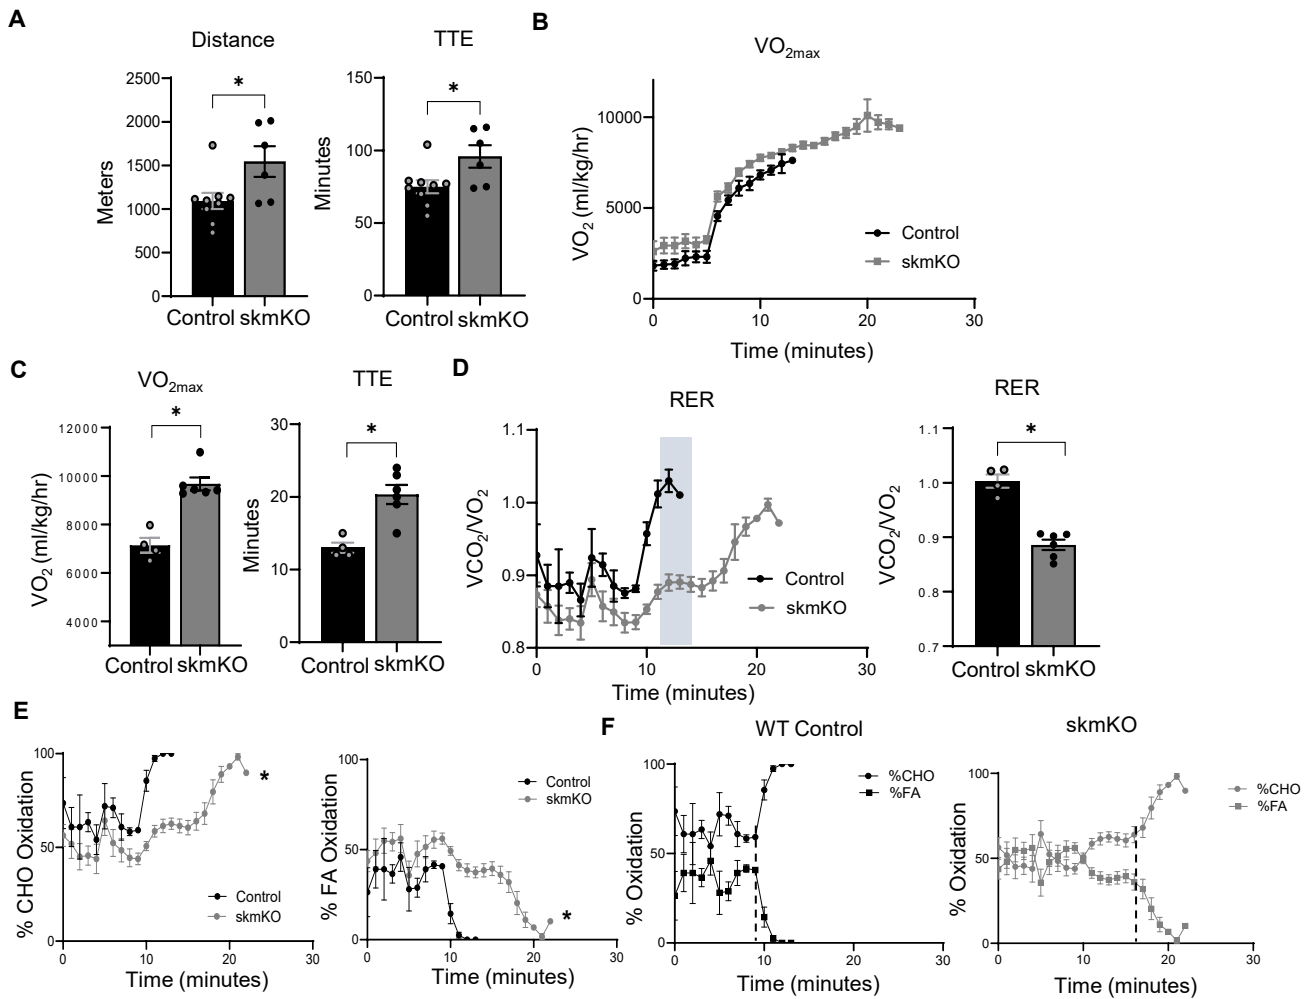

**Supplemental Figure 5. *skmNrip1*<sup>-/-</sup> (skmKO) mice phenocopy the enhanced endurance phenotype of *strNrip1*<sup>-/-</sup> (strKO) mice.** (A) Endurance performance results showing distance and time to exhaustion (TTE) comparing 8-week-old WT control and *skmNrip1*<sup>-/-</sup> (skmKO) male mice (n=6-8 per group). (B)  $VO_2$  comparing 8-week-old WT control and skmKO male mice plotted against time during the  $VO_{2max}$  exercise protocol (n=4-6 mice per group). (C)  $VO_{2max}$  and time to exhaustion (TTE) comparing WT control and skmKO mice from the  $VO_{2max}$  exercise protocol (n=4-6 per group). (D) Respiratory Exchange Ratio (RER) comparing WT control and skmKO male mice throughout the  $VO_{2max}$  protocol and plotted at the point of control exhaustion (n=4-6 mice per group). (E) Percent carbohydrate (CHO) and fat (FA) oxidation calculated from RER measurements derived from the  $VO_{2max}$  testing protocol comparing 8-week-old control and skmKO mice (n=4-6 mice per group). (F) Crossover oxidation and aerobic threshold (displayed by the dotted line) represented in WT control and strKO mice derived from %CHO and %FA oxidation measurements (n=4-6 mice per group). Values are the mean  $\pm$  SEM. \*P < 0.05 by 2-tailed, unpaired Student's t-test.

# Supplemental Figure 6

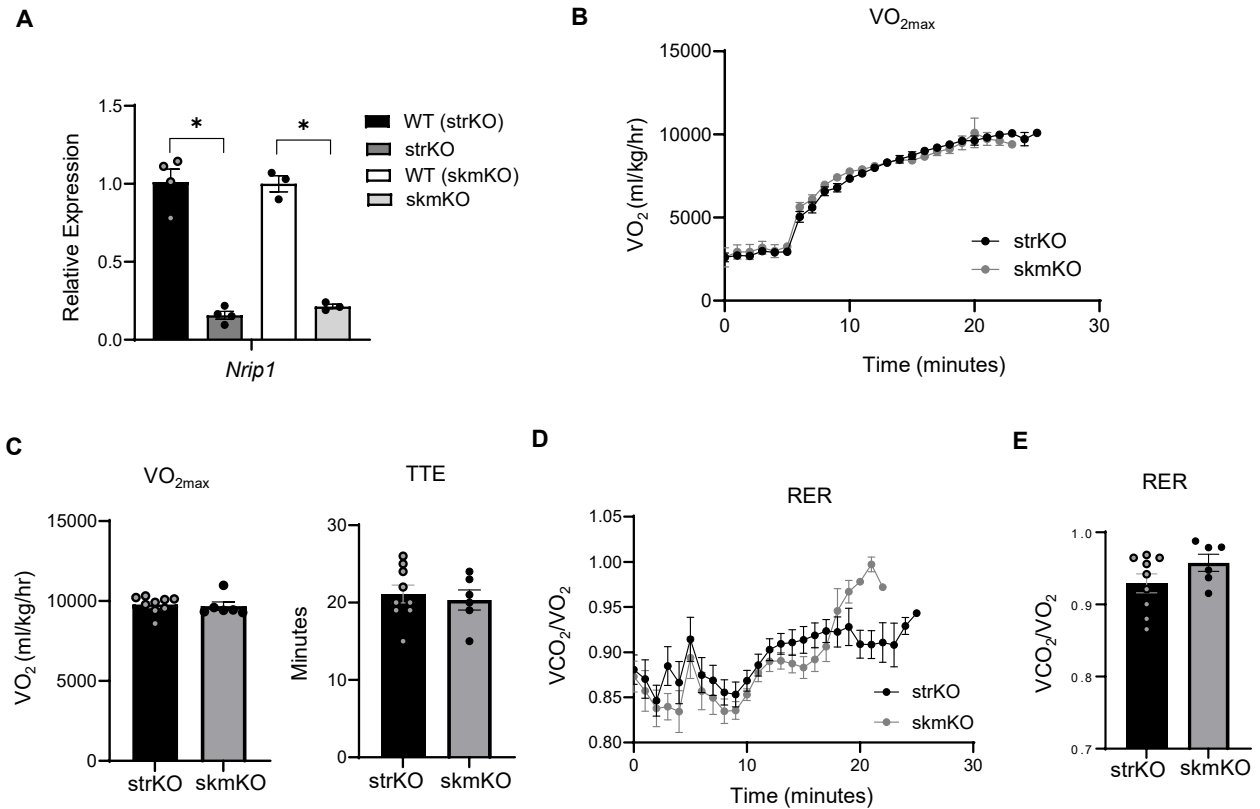

**Supplemental Figure 6. *strNrip1*<sup>-/-</sup> and *skmNrip1*<sup>-/-</sup> display no differences in exercise phenotype.** (A) Comparison of *Nrip1* gene expression measured by RT-qPCR comparing 8-week-old *strNrip1*<sup>-/-</sup> (WT and strKO) and *skmNrip1*<sup>-/-</sup> (WT and skmKO) male mice (n= 3-4 mice per group). (B)  $VO_2$  plotted against time of the  $VO_{2max}$  exercise protocol comparing strKO and skmKO mice (n= 6-9 mice per group). (C)  $VO_{2max}$  values and time to exhaustion (TTE) from the  $VO_{2max}$  exercise protocol comparing strKO and skmKO mice (n= 6-9 mice per group). (D) Respiratory exchange ratio (RER) derived from the  $VO_{2max}$  exercise protocol comparing strKO and skmKO mice (n= 6-9 mice per group). (E) RER values at exhaustion comparing strKO and skmKO mice (n= 6-9 mice per group). Values are the mean  $\pm$  SEM. \**P* < 0.05 versus control, by 2-tailed, unpaired Student's *t* test.

# Supplemental Figure 7

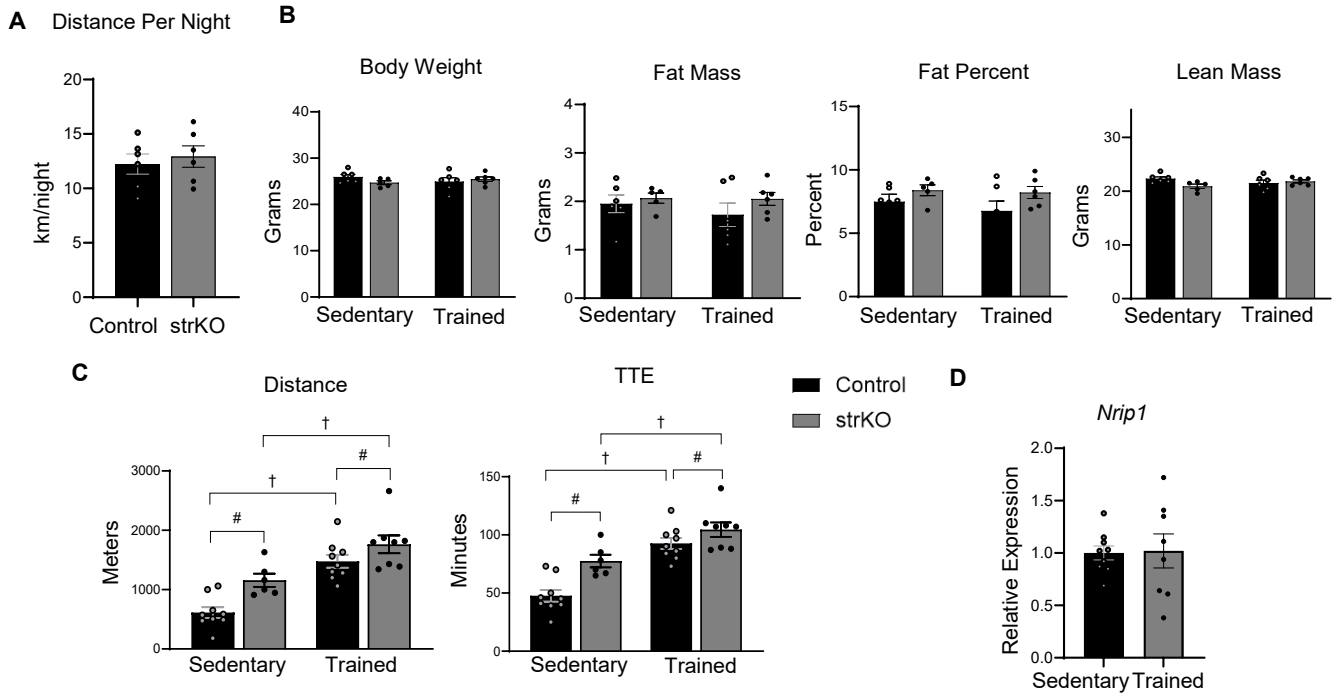

**Supplemental Figure 7. Exercise training endpoints.** (A) Distance ran per night averaged during the 8-week voluntary wheel training period comparing WT control and *strNrip1*<sup>-/-</sup> (strKO) male mice (n= 6 mice per group). (B) Body composition including body weight, lean mass, fat mass, and fat percentage among WT control sedentary, strKO sedentary, WT control trained, and strKO trained 16-week-old male mice of the training study (n= 5-6 per group). (C) Distance and time to exhaustion from the endurance performance treadmill protocol comparing WT control sedentary, strKO sedentary, WT control trained, and strKO trained 16-week-old male mice of the training study (n= 6-9 per group). (D) *Nrip1* gene expression measured by RT-qPCR comparing control sedentary and control trained 16-week-old male mice (n= 8-9 per group). Values are the mean  $\pm$  SEM. #P < 0.05 comparing genotypes and †P < 0.05 comparing training by 2-way ANOVA displaying main effects or 2-tailed, unpaired Student's *t* test.

# Supplemental Figure 8

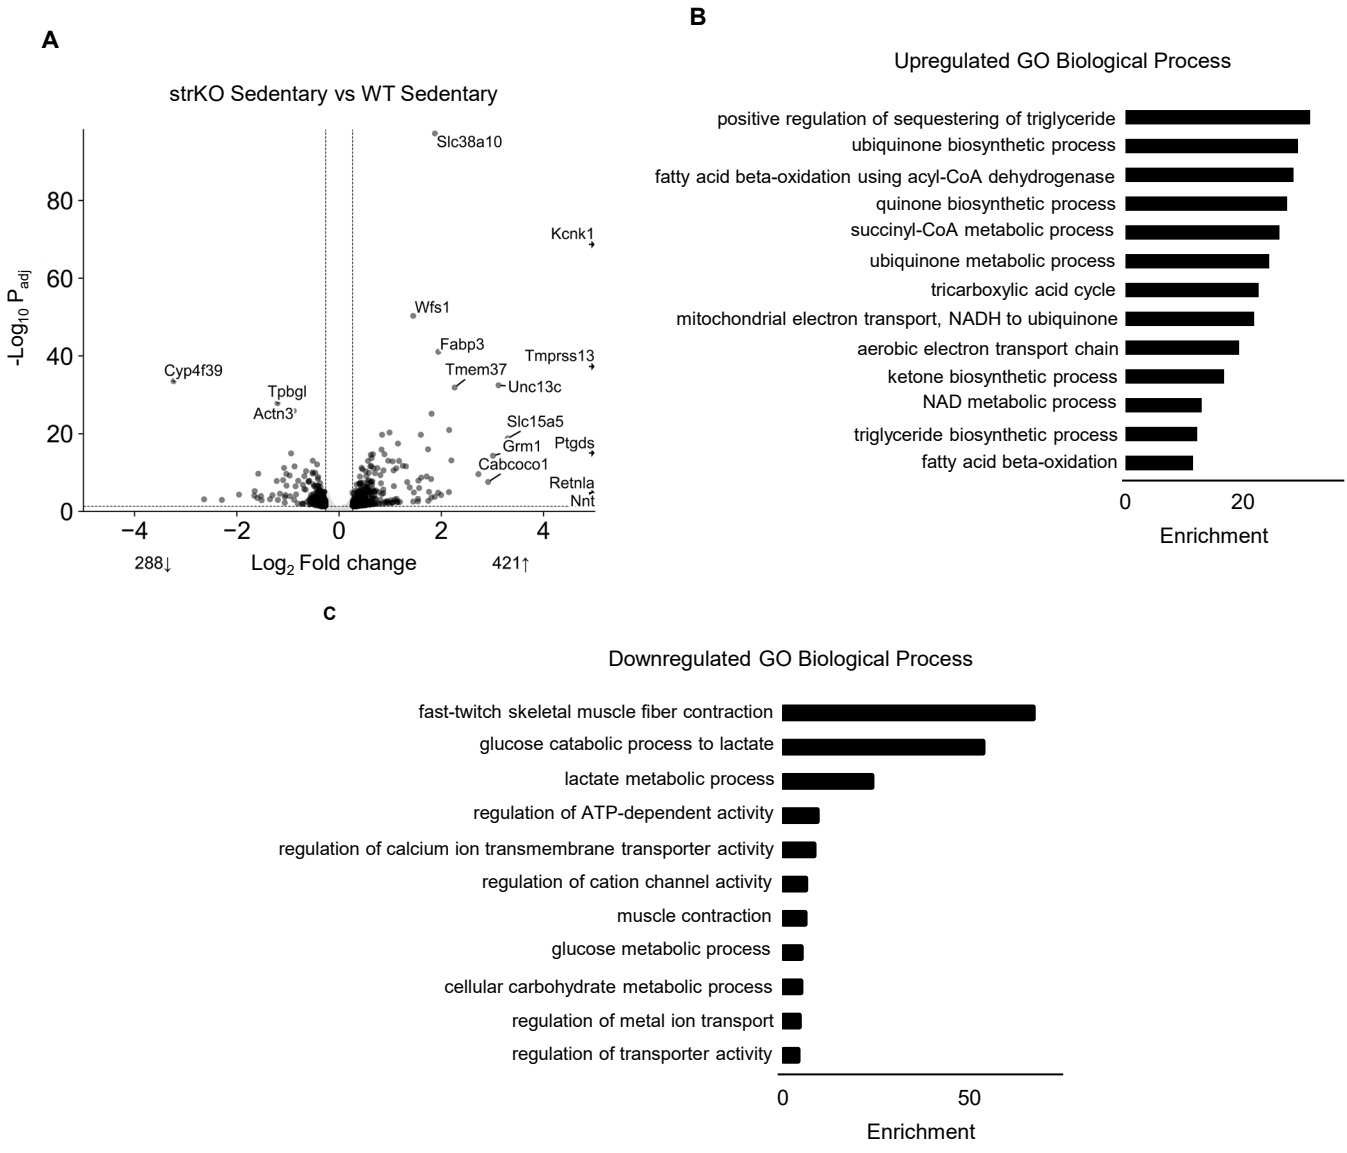

**Supplemental Figure 8. RIP140 regulates an array of pathways/processes known to be involved in muscle endurance. (A)** Volcano plot of differentially expressed genes from RNA-sequencing comparing 16-week-old male *strNrip1*<sup>-/-</sup> (strKO) and WT control sedentary extensor digitalis longus (EDL) muscle (n=3 per group). Fold change (FC) >1.2; FDR <0.05. **(B)** Top 20 upregulated biological process pathways in strKO sedentary EDL compared to WT control sedentary EDL. **(C)** Top 20 downregulated biological process pathways in strKO sedentary EDL compared to control sedentary EDL.

# Supplemental Figure 9

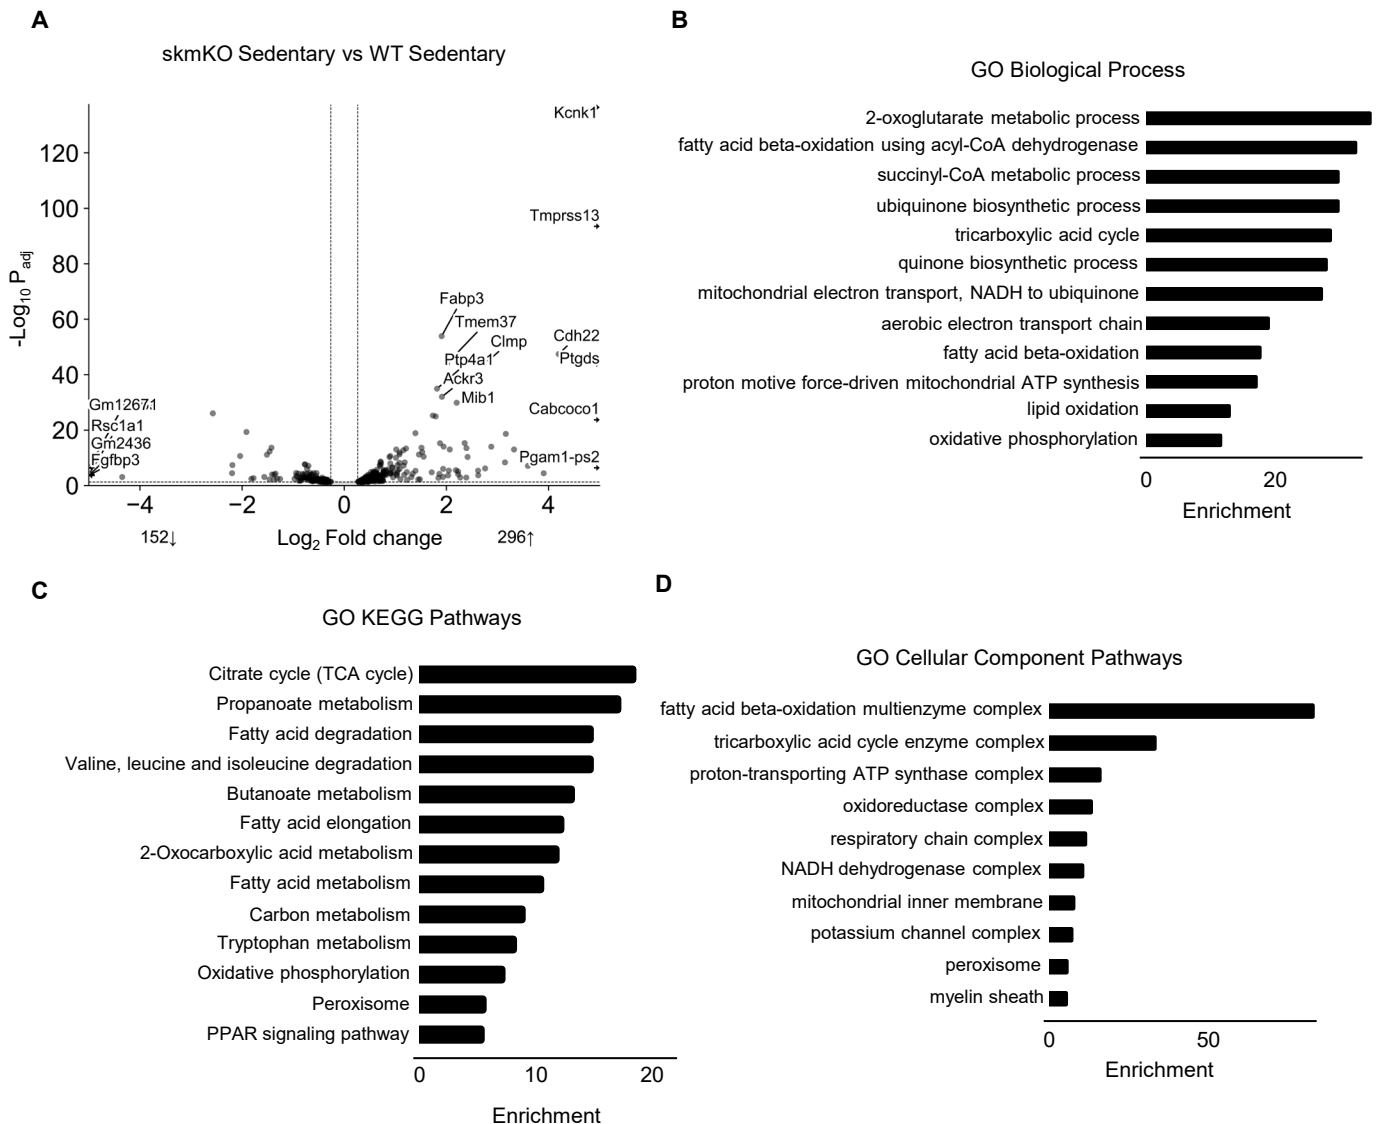

**Supplemental Figure 9. Transcriptome of *skmNrip1<sup>-/-</sup>* (*skmKO*) muscle recapitulates *strNrip1<sup>-/-</sup>* (*strKO*) muscle transcriptome.** (A) Volcano plot of differentially expressed genes from RNA-sequencing comparing 8-week-old male *skmKO* and WT control sedentary tibialis anterior (TA) muscle (n= 3 per group). Fold change (FC) >1.2; FDR <0.05. (B) Top upregulated enriched biological process pathways in *skmKO* sedentary TA compared to control sedentary TA. (C) Top upregulated KEGG pathways in *skmKO* sedentary TA compared to WT control sedentary TA. (D) Top upregulated enriched cellular compartment pathways in *skmKO* sedentary TA compared to control sedentary TA.

# Supplemental Figure 10

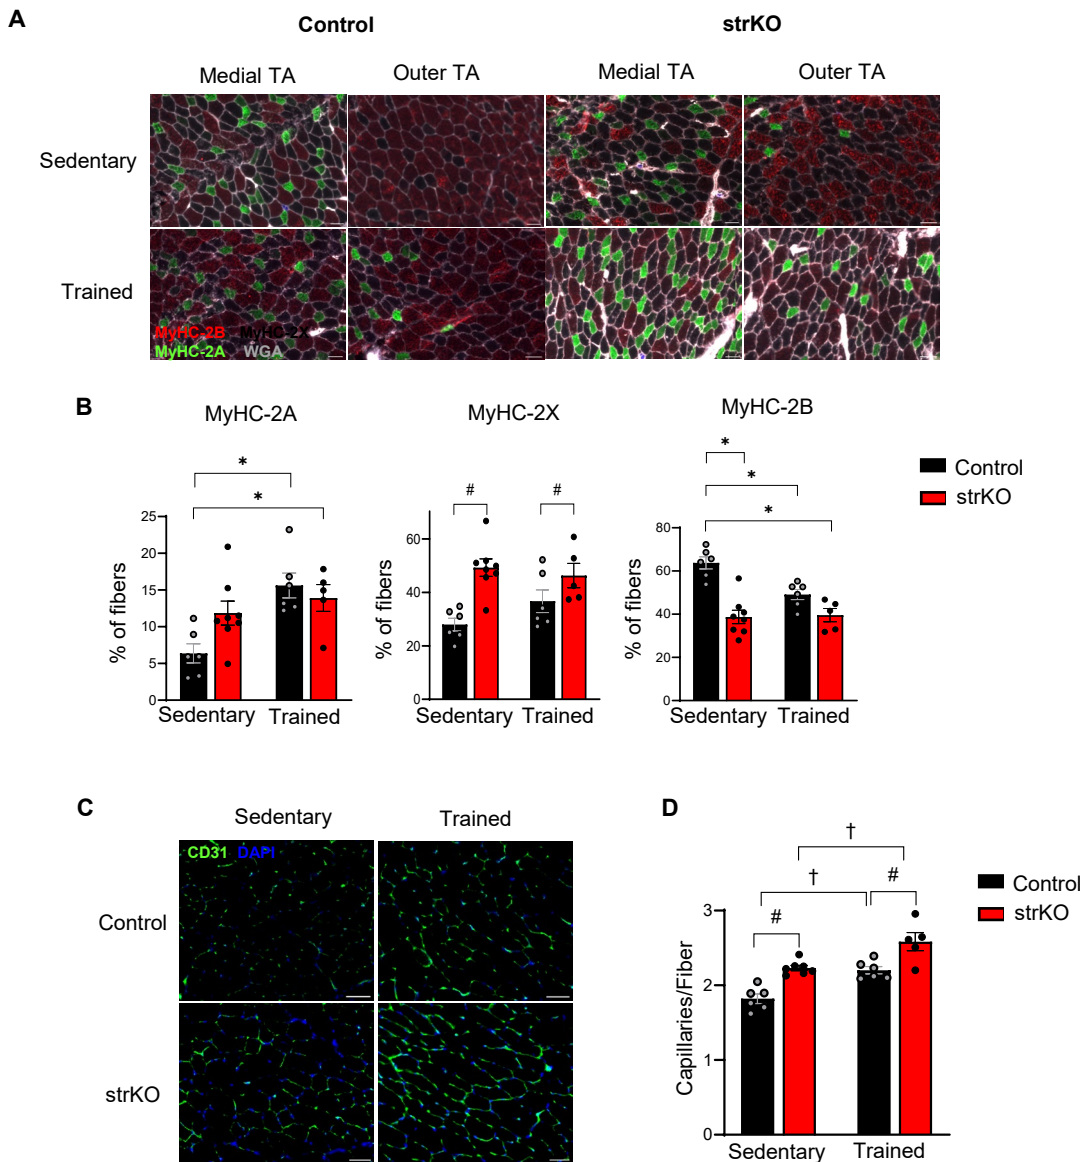

**Supplemental Figure 10. *strNrip1*<sup>-/-</sup> (strKO) mice display a shift in fiber type and increased angiogenesis.** (A) Fiber type staining of tibialis anterior (TA) muscle displaying outer and medial areas from 16-week-old male strKO sedentary, control sedentary, strKO trained, and WT control trained mice (n=5-8 mice per group). Scale bar: 50  $\mu$ m. (B) Quantification of myosin expression (MyHC-2A, MyHC-2X, and MyHC-2B) from TA fiber type images of male strKO sedentary, control sedentary, strKO trained, and WT control trained mice. (C) CD31 staining (green) in TA muscle from 16-week-old male strKO sedentary, control sedentary, strKO trained, and WT control trained mice (n=5-7 mice per group). Scale bar: 50  $\mu$ m. (D) Quantification of capillaries per muscle fiber from CD31 TA immunofluorescence images from strKO sedentary, control sedentary, strKO trained, and WT control trained mice (n=5-6 mice per group). Values are the mean  $\pm$  SEM. #P < 0.05 comparing genotypes and †P < 0.05 comparing training by 2-way ANOVA displaying main effects or \*P < 0.05 by Tukey's multiple-comparison test.

**Supplemental Table 1. qPCR primers.**

| <b>Gene</b> | <b>Forward</b>               | <b>Reverse</b>             |
|-------------|------------------------------|----------------------------|
| Acs11       | CGCCCATATGTTTGAGACCG         | GTCGTCCATAAGCAGCCTGA       |
| Bdnf        | TGGCCCTGCGGAGGCTAAGT         | AGGGTGCTCCGAGCCTTCCT       |
| Cd36        | TGGAGTGGTGATGTTTGTTC         | AGCCAGTGTATATGTAGGCTCA     |
| Chrna2      | AAAGTCACGCTTGCACTC           | GATGTTGCCAAACTCAGCCG       |
| Dgat2       | GCATTTGACTGGAACACGCC         | CTGGTGGTCAGCAGGTTGTG       |
| Dgat1       | GCGACGGCTACTGGGATCTG         | TGCATTACTIONCAGGATCAGCATCA |
| Fabp3       | AAGTGAACGGGCAGGAGA           | GAGGAGCGGGCGGTCAG          |
| Gk          | CCGTTACTCCACATGGAAGAAAGCTGTG | GCATCTTGAAATCCGTGAGGTGG    |
| Musk        | TGAGAACTGCCCTTGGAACT         | GGGTCTATCAGCAGGCAGCTT      |
| Nrip1       | GAGGCCCGGAGAATCTGAAG         | TTTCGTTGCTCACCAAACGC       |
| Plin2       | GACCTTGTCCTCCGCTTAT          | CAACCGCAATTTGTGGCTC        |
| Plin5       | GGATCACTTCTGCCATGAC          | ATCCTCACCGAACCCACTTC       |
| Pnpla2      | CAACGCCACTCACATCTACGG        | TGAAGGAGGGATGCAGAGGAC      |
| Scd1        | GCAAGGTAATGTGGCTTTGGCTGA     | TTAGCACTTGCCCATGTCTCTGGT   |
| Wnt16       | AGTAGCGGCACCAAGGAGAC         | GAAACTTTCTGCTGAACCACATGC   |
| Unc13c      | TCTGACACCAAGACAATGTGC        | AGCAATATTTTCATGCAGGAGG     |

**Supplemental Table 2. ChIP-qPCR primers.**

| <b>Gene</b>  | <b>Forward</b>        | <b>Reverse</b>        |
|--------------|-----------------------|-----------------------|
| Dgat2        | CGCGCGCACTTTATAACCTC  | GGGAGTCTCACCCCTACAA   |
| HNF $\alpha$ | TGGCCGTGAGCATCCTCTGCC | GCGTGGGTTGCGTTTGCCTGC |
| Wnt16        | AAGAAGCTCCTGGGCGAAAG  | GCAAGAAGGGGGTGTCTGA   |
